# Supplementary material
Source: PubMed Central journal article supplement (PMC2770199)
Supplement: NIHMS105583-supplement-Supplementary1.pdf [file NIHMS105583-supplement-Supplementary1.pdf]

# Partial Correlation Estimation by Joint Sparse Regression Models — Supplemental Material

## Part I

In this section, we list properties of the loss function:

$$L(\theta, \sigma, Y) = \frac{1}{2} \sum_{i=1}^p w_i (y_i - \sum_{j \neq i} \sqrt{\sigma^{jj}/\sigma^{ii}} \rho^{ij} y_j)^2 = \frac{1}{2} \sum_{i=1}^p \tilde{w}_i (\tilde{y}_i - \sum_{j \neq i} \rho^{ij} \tilde{y}_j)^2, \quad (\text{S-1})$$

where  $Y = (y_1, \dots, y_p)^T$  and  $\tilde{y}_i = \sqrt{\sigma^{ii}} y_i, \tilde{w}_i = w_i/\sigma^{ii}$ . These properties are used for the proof of the main results. Note: throughout the supplementary material, when evaluation is taken place at  $\sigma = \bar{\sigma}$ , sometimes we omit the argument  $\sigma$  in the notation for simplicity. Also we use  $Y = (y_1, \dots, y_p)^T$  to denote a generic sample and use  $\mathbf{Y}$  to denote the  $p \times n$  data matrix consisting of  $n$  i.i.d. such samples:  $\mathbf{Y}^1, \dots, \mathbf{Y}^n$ , and define

$$L_n(\theta, \sigma, \mathbf{Y}) := \frac{1}{n} \sum_{k=1}^n L(\theta, \sigma, \mathbf{Y}^k). \quad (\text{S-2})$$

**A1:** for all  $\theta, \sigma$  and  $Y \in \mathcal{R}^p$ ,  $L(\theta, \sigma, Y) \geq 0$ .

**A2:** for any  $Y \in \mathcal{R}^p$  and any  $\sigma > 0$ ,  $L(\cdot, \sigma, Y)$  is convex in  $\theta$ ; and with probability one,  $L(\cdot, \sigma, Y)$  is strictly convex.

**A3:** for  $1 \leq i < j \leq p$

$$\bar{L}'_{ij}(\bar{\theta}, \bar{\sigma}) := E_{(\bar{\theta}, \bar{\sigma})} \left( \frac{\partial L(\theta, \sigma, Y)}{\partial \rho^{ij}} \Big|_{\theta=\bar{\theta}, \sigma=\bar{\sigma}} \right) = 0.$$

**A4:** for  $1 \leq i < j \leq p$  and  $1 \leq k < l \leq p$ ,

$$\bar{L}''_{ij,kl}(\theta, \sigma) := E_{(\theta, \sigma)} \left( \frac{\partial^2 L(\theta, \sigma, Y)}{\partial \rho^{ij} \partial \rho^{kl}} \right) = \frac{\partial}{\partial \rho^{kl}} \left[ E_{(\theta, \sigma)} \left( \frac{\partial L(\theta, \sigma, Y)}{\partial \rho^{ij}} \right) \right],$$

and  $\bar{L}''(\bar{\theta}, \bar{\sigma})$  is positive semi-definite.

If assuming C0-C1, then we have

**B0 :** There exist constants  $0 < \bar{\sigma}_0 \leq \bar{\sigma}_\infty < \infty$  such that:  $0 < \bar{\sigma}_0 \leq \min\{\bar{\sigma}^{ii} : 1 \leq i \leq p\} \leq \max\{\bar{\sigma}^{ii} : 1 \leq i \leq p\} \leq \bar{\sigma}_\infty$ .

**B1 :** There exist constants  $0 < \Lambda_{\min}^L(\bar{\theta}) \leq \Lambda_{\max}^L(\bar{\theta}) < \infty$ , such that

$$0 < \Lambda_{\min}^L(\bar{\theta}) \leq \lambda_{\min}(\bar{L}''(\bar{\theta})) \leq \lambda_{\max}(\bar{L}''(\bar{\theta})) \leq \Lambda_{\max}^L(\bar{\theta}) < \infty$$

**B1.1 :** There exists a constant  $K(\bar{\theta}) < \infty$ , such that for all  $1 \leq i < j \leq p$ ,  $\bar{L}''_{ij,ij}(\bar{\theta}) \leq K(\bar{\theta})$ .

**B1.2 :** There exist constants  $M_1(\bar{\theta}), M_2(\bar{\theta}) < \infty$ , such that for any  $1 \leq i < j \leq p$

$$\text{Var}_{(\bar{\theta}, \bar{\sigma})}(L'_{ij}(\bar{\theta}, \bar{\sigma}, Y)) \leq M_1(\bar{\theta}), \quad \text{Var}_{(\bar{\theta}, \bar{\sigma})}(L''_{ij,ij}(\bar{\theta}, \bar{\sigma}, Y)) \leq M_2(\bar{\theta}).$$

**B1.3 :** There exists a constant  $0 < g(\bar{\theta}) < \infty$ , such that for all  $(i, j) \in \mathcal{A}$

$$\bar{L}''_{ij,ij}(\bar{\theta}, \bar{\sigma}) - \bar{L}''_{ij, \mathcal{A}_{ij}}(\bar{\theta}, \bar{\sigma}) \left[ \bar{L}''_{\mathcal{A}_{ij}, \mathcal{A}_{ij}}(\bar{\theta}, \bar{\sigma}) \right]^{-1} \bar{L}''_{\mathcal{A}_{ij}, ij}(\bar{\theta}, \bar{\sigma}) \geq g(\bar{\theta}),$$

where  $\mathcal{A}_{ij} = \mathcal{A}/\{(i, j)\}$ .

**B1.4** : There exists a constant  $M(\bar{\theta}) < \infty$ , such that for any  $(i, j) \in \mathcal{A}^c$

$$\|\bar{L}''_{ij, \mathcal{A}}(\bar{\theta})[\bar{L}''_{\mathcal{A}\mathcal{A}}(\bar{\theta})]^{-1}\|_2 \leq M(\bar{\theta}).$$

**B2** There exists a constant  $K_1(\bar{\theta}) < \infty$ , such that for any  $1 \leq i \leq j \leq p$ ,

$$\|E_{\bar{\theta}}(\tilde{y}_i \tilde{y}_j \tilde{y} \tilde{y}^T)\| \leq K_1(\bar{\theta}), \text{ where } \tilde{y} = (\tilde{y}_1, \dots, \tilde{y}_p)^T.$$

**B3** If we further assume that condition  $D$  holds for  $\hat{\sigma}$  and  $q_n \sim o(\frac{n}{\log n})$ , we have: for any  $\eta > 0$ , there exist constants  $C_{1,\eta}, C_{2,\eta} > 0$ , such that for sufficiently large  $n$

$$\max_{1 \leq i < k \leq p} |L'_{n,ik}(\bar{\theta}, \bar{\sigma}, \mathbf{Y}) - L'_{n,ik}(\bar{\theta}, \hat{\sigma}, \mathbf{Y})| \leq C_{1,\eta} \left( \sqrt{\frac{\log n}{n}} \right),$$

$$\max_{1 \leq i < k \leq p, 1 \leq t < s \leq p} |L''_{n,ik,ts}(\bar{\theta}, \bar{\sigma}, \mathbf{Y}) - L''_{n,ik,ts}(\bar{\theta}, \hat{\sigma}, \mathbf{Y})| \leq C_{2,\eta} \left( \sqrt{\frac{\log n}{n}} \right),$$

hold with probability at least  $1 - O(n^{-\eta})$ .

B0 follows from C1 immediately. B1.1–B1.4 are direct consequences of B1. B2 follows from B1 and Gaussianity. B3 follows from conditions C0–C1 and D.

proof of A1: obvious.

proof of A2: obvious.

proof of A3: denote the residual for the  $i$ th term by

$$e_i(\theta, \sigma) = \tilde{y}_i - \sum_{j \neq i} \rho^{ij} \tilde{y}_j.$$

Then evaluated at the true parameter values  $(\bar{\theta}, \bar{\sigma})$ , we have  $e_i(\bar{\theta}, \bar{\sigma})$  uncorrelated with  $\tilde{y}_{(-i)}$  and  $E_{(\bar{\theta}, \bar{\sigma})}(e_i(\bar{\theta}, \bar{\sigma})) = 0$ . It is easy to show

$$\frac{\partial L(\theta, \sigma, Y)}{\partial \rho^{ij}} = -\tilde{w}_i e_i(\theta, \sigma) \tilde{y}_j - \tilde{w}_j e_j(\theta, \sigma) \tilde{y}_i.$$

This proves A3.

proof of A4: see the proof of B1.

proof of B1: Denote  $\tilde{y} = (\tilde{y}_1, \dots, \tilde{y}_p)^T$ , and  $\tilde{x} = (\tilde{x}_{(1,2)}, \tilde{x}_{(1,3)}, \dots, \tilde{x}_{(p-1,p)})$  with  $\tilde{x}_{(i,j)} = (0, \dots, 0, \tilde{y}_j, \dots, \tilde{y}_i, 0, \dots, 0)^T$ . Then the loss function (S-1) can be written as  $L(\theta, \sigma, Y) = \frac{1}{2} \|\tilde{w}(\tilde{y} - \tilde{x}\theta)\|_2^2$ , with  $\tilde{w} = \text{diag}(\sqrt{\tilde{w}_1}, \dots, \sqrt{\tilde{w}_p})$ . Thus  $\bar{L}''(\theta, \sigma) = E_{(\theta, \sigma)} [\tilde{x}^T \tilde{w}^2 \tilde{x}]$  (this proves A4). Let  $d = p(p-1)/2$ , then  $\tilde{x}$  is a  $p$  by  $d$  matrix. Denote its  $i$ th row by  $x_i^T$  ( $1 \leq i \leq p$ ). Then for any  $a \in \mathcal{R}^d$ , with  $\|a\|_2 = 1$ , we have

$$a^T \bar{L}''(\bar{\theta}) a = E_{\bar{\theta}}(a^T \tilde{x}^T \tilde{w}^2 \tilde{x} a) = E_{\bar{\theta}} \left( \sum_{i=1}^p \tilde{w}_i (x_i^T a)^2 \right).$$

Index the elements of  $a$  by  $a = (a_{(1,2)}, a_{(1,3)}, \dots, a_{(p-1,p)})^T$ , and for each  $1 \leq i \leq p$ , define  $a_i \in \mathcal{R}^p$  by  $a_i = (a_{(1,i)}, \dots, a_{(i-1,i)}, 0, a_{(i,i+1)}, \dots, a_{(i,p)})^T$ . Then by definition  $x_i^T a = \tilde{y}^T a_i$ . Also note that  $\sum_{i=1}^p \|a_i\|_2^2 = 2\|a\|_2^2 = 2$ . This is because, for  $i \neq j$ , the  $j$ th entry of  $a_i$  appears exactly twice in  $a$ . Therefore

$$a^T \bar{L}''(\bar{\theta}) a = \sum_{i=1}^p \tilde{w}_i E_{\bar{\theta}}(a_i^T \tilde{y} \tilde{y}^T a_i) = \sum_{i=1}^p \tilde{w}_i a_i^T \tilde{\Sigma} a_i \geq \sum_{i=1}^p \tilde{w}_i \lambda_{\min}(\tilde{\Sigma}) \|a_i\|_2^2 \geq 2\tilde{w}_0 \lambda_{\min}(\tilde{\Sigma}),$$

where  $\tilde{\Sigma} = \text{Var}(\tilde{y})$  and  $\tilde{w}_0 = w_0/\bar{\sigma}_\infty$ . Similarly  $a^T \bar{L}''(\bar{\theta}) a \leq 2\tilde{w}_\infty \lambda_{\max}(\tilde{\Sigma})$ , with  $\tilde{w}_\infty = w_\infty/\bar{\sigma}_0$ . By C1,  $\tilde{\Sigma}$  has bounded eigenvalues, thus B1 is proved.

proof of B1.1: obvious.

proof of B1.2: note that  $\text{Var}_{(\bar{\theta}, \bar{\sigma})}(e_i(\bar{\theta}, \bar{\sigma})) = 1/\bar{\sigma}^{ii}$  and  $\text{Var}_{(\bar{\theta}, \bar{\sigma})}(\tilde{y}_i) = \bar{\sigma}^{ii}$ . Then for any  $1 \leq i < j \leq p$ , by Cauchy-Schwartz

$$\begin{aligned}
\text{Var}_{(\bar{\theta}, \bar{\sigma})}(L'_{n,ij}(\bar{\theta}, \bar{\sigma}, Y)) &= \text{Var}_{(\bar{\theta}, \bar{\sigma})}(-\tilde{w}_i e_i(\bar{\theta}, \bar{\sigma}) \tilde{y}_j - \tilde{w}_j e_j(\bar{\theta}, \bar{\sigma}) \tilde{y}_i) \\
&\leq E_{(\bar{\theta}, \bar{\sigma})}(\tilde{w}_i^2 e_i^2(\bar{\theta}, \bar{\sigma}) \tilde{y}_j^2) + E_{(\bar{\theta}, \bar{\sigma})}(\tilde{w}_j^2 e_j^2(\bar{\theta}, \bar{\sigma}) \tilde{y}_i^2) \\
&\quad + 2\sqrt{\tilde{w}_i^2 \tilde{w}_j^2 E_{(\bar{\theta}, \bar{\sigma})}(e_i^2(\bar{\theta}, \bar{\sigma}) \tilde{y}_j^2) E_{(\bar{\theta}, \bar{\sigma})}(e_j^2(\bar{\theta}, \bar{\sigma}) \tilde{y}_i^2)} \\
&= \frac{w_i^2 \bar{\sigma}^{jj}}{(\bar{\sigma}^{ii})^3} + \frac{w_j^2 \bar{\sigma}^{ii}}{(\bar{\sigma}^{jj})^3} + 2 \frac{w_i w_j}{\bar{\sigma}^{ii} \bar{\sigma}^{jj}}.
\end{aligned}$$

The right hand side is bounded because of C0 and B0.

proof of B1.3: for  $(i, j) \in \mathcal{A}$ , denote

$$D := \bar{L}''_{ij,ij}(\bar{\theta}, \bar{\sigma}) - \bar{L}''_{ij,\mathcal{A}ij}(\bar{\theta}, \bar{\sigma}) \left[ \bar{L}''_{\mathcal{A}ij,\mathcal{A}ij}(\bar{\theta}, \bar{\sigma}) \right]^{-1} \bar{L}''_{\mathcal{A}ij,ij}(\bar{\theta}, \bar{\sigma}).$$

Then  $D^{-1}$  is the  $(ij, ij)$  entry in  $\left[ \bar{L}''_{\mathcal{A},\mathcal{A}}(\bar{\theta}) \right]^{-1}$ . Thus by B1,  $D^{-1}$  is positive and bounded from above, so  $D$  is bounded away from zero.

proof of B1.4: note that  $\|\bar{L}''_{ij,\mathcal{A}}(\bar{\theta}) [\bar{L}''_{\mathcal{A}\mathcal{A}}(\bar{\theta})]^{-1}\|_2^2 \leq \|\bar{L}''_{ij,\mathcal{A}}(\bar{\theta})\|_2^2 \lambda_{\max}([\bar{L}''_{\mathcal{A}\mathcal{A}}(\bar{\theta})]^{-2})$ . By B1,  $\lambda_{\max}([\bar{L}''_{\mathcal{A}\mathcal{A}}(\bar{\theta})]^{-2})$  is bounded from above, thus it suffices to show that  $\|\bar{L}''_{ij,\mathcal{A}}(\bar{\theta})\|_2^2$  is bounded. Since  $(i, j) \in \mathcal{A}^c$ , define  $\mathcal{A}^+ := (i, j) \cup \mathcal{A}$ . Then  $\bar{L}''_{ij,ij}(\bar{\theta}) - \bar{L}''_{ij,\mathcal{A}}(\bar{\theta}) [\bar{L}''_{\mathcal{A}\mathcal{A}}(\bar{\theta})]^{-1} \bar{L}''_{\mathcal{A},ij}(\bar{\theta})$  is the inverse of the  $(1, 1)$  entry of  $\bar{L}''_{\mathcal{A}^+,\mathcal{A}^+}(\bar{\theta})$ . Thus by B1, it is bounded away from zero. Therefore by B1.1,  $\bar{L}''_{ij,\mathcal{A}}(\bar{\theta}) [\bar{L}''_{\mathcal{A}\mathcal{A}}(\bar{\theta})]^{-1} \bar{L}''_{\mathcal{A},ij}(\bar{\theta})$  is bounded from above. Since  $\bar{L}''_{ij,\mathcal{A}}(\bar{\theta}) [\bar{L}''_{\mathcal{A}\mathcal{A}}(\bar{\theta})]^{-1} \bar{L}''_{\mathcal{A},ij}(\bar{\theta}) \geq \|\bar{L}''_{ij,\mathcal{A}}(\bar{\theta})\|_2^2 \lambda_{\min}([\bar{L}''_{\mathcal{A}\mathcal{A}}(\bar{\theta})]^{-1})$ , and by B1,  $\lambda_{\min}([\bar{L}''_{\mathcal{A}\mathcal{A}}(\bar{\theta})]^{-1})$  is bounded away from zero, we have  $\|\bar{L}''_{ij,\mathcal{A}}(\bar{\theta})\|_2^2$  bounded from above.

proof of B2: the  $(k, l)$ -th entry of the matrix  $\tilde{y}_i \tilde{y}_j \tilde{y}_k \tilde{y}_l^T$  is  $\tilde{y}_i \tilde{y}_j \tilde{y}_k \tilde{y}_l$ , for  $1 \leq k < l \leq p$ . Thus, the  $(k, l)$ -th entry of the matrix  $\mathbb{E}[\tilde{y}_i \tilde{y}_j \tilde{y}_k \tilde{y}_l^T]$  is  $\mathbb{E}[\tilde{y}_i \tilde{y}_j \tilde{y}_k \tilde{y}_l] = \tilde{\sigma}_{ij} \tilde{\sigma}_{kl} + \tilde{\sigma}_{ik} \tilde{\sigma}_{jl} + \tilde{\sigma}_{il} \tilde{\sigma}_{jk}$ .

Thus, we can write

$$\mathbb{E}[\tilde{y}_i \tilde{y}_j \tilde{y} \tilde{y}^T] = \tilde{\sigma}_{ij} \tilde{\Sigma} + \tilde{\sigma}_i \tilde{\sigma}_j^T + \tilde{\sigma}_j \tilde{\sigma}_i^T, \quad (\text{S-3})$$

where  $\tilde{\sigma}_i$  is the  $p \times 1$  vector  $(\tilde{\sigma}_{ik})_{k=1}^p$ . From (S-3), we have

$$\| \mathbb{E}[\tilde{y}_i \tilde{y}_j \tilde{y} \tilde{y}^T] \| \leq |\tilde{\sigma}_{ij}| \| \tilde{\Sigma} \| + 2 \| \tilde{\sigma}_i \|_2 \| \tilde{\sigma}_j \|_2, \quad (\text{S-4})$$

where  $\| \cdot \|$  is the operator norm. By C0-C1, the first term on the right hand side is uniformly bounded. Now, we also have,

$$\tilde{\sigma}_{ii} - \tilde{\sigma}_i^T \tilde{\Sigma}_{(-i)}^{-1} \tilde{\sigma}_i > 0 \quad (\text{S-5})$$

where  $\tilde{\Sigma}_{(-i)}$  is the submatrix of  $\tilde{\Sigma}$  removing  $i$ -th row and column. From this, it follows that

$$\begin{aligned} \| \tilde{\sigma}_i \|_2 &= \| \tilde{\Sigma}_{(-i)}^{1/2} \tilde{\Sigma}_{(-i)}^{-1/2} \tilde{\sigma}_i \|_2 \\ &\leq \| \tilde{\Sigma}_{(-i)}^{1/2} \| \| \tilde{\Sigma}_{(-i)}^{-1/2} \tilde{\sigma}_i \|_2 \\ &\leq \sqrt{\| \tilde{\Sigma} \|} \sqrt{\tilde{\sigma}_{ii}}, \end{aligned} \quad (\text{S-6})$$

where the last inequality follows from (S-5), and the fact that  $\tilde{\Sigma}_{(-i)}$  is a principal submatrix of  $\tilde{\Sigma}$ . Thus the result follows by applying (S-6) to bound the last term in (S-4).

proof of B3:

$$\begin{aligned} L'_{n,ik}(\bar{\theta}, \sigma, \mathbf{Y}) &= \frac{1}{n} \sum_{l=1}^n -w_i \left( y_i^l - \sum_{j \neq i} \sqrt{\frac{\sigma^{jj}}{\sigma^{ii}}} \rho^{ij} y_j^l \right) \sqrt{\frac{\sigma^{kk}}{\sigma^{ii}}} y_k^l \\ &\quad - w_k \left( y_k^l - \sum_{j \neq k} \sqrt{\frac{\sigma^{jj}}{\sigma^{kk}}} \rho^{kj} y_j^l \right) \sqrt{\frac{\sigma^{ii}}{\sigma^{kk}}} y_i^l. \end{aligned}$$

Thus,

$$\begin{aligned}
& L'_{n,ik}(\bar{\theta}, \bar{\sigma}, \mathbf{Y}) - L'_{n,ik}(\bar{\theta}, \hat{\sigma}, \mathbf{Y}) \\
&= -w_i \left[ \frac{\overline{y_i y_k}}{y_i y_k} \left( \sqrt{\frac{\sigma^{kk}}{\sigma^{ii}}} - \sqrt{\frac{\hat{\sigma}^{kk}}{\hat{\sigma}^{ii}}} \right) - \sum_{j \neq i} \overline{y_j y_k} \rho^{ij} \left( \frac{\sqrt{\sigma^{jj} \sigma^{kk}}}{\sigma^{ii}} - \frac{\sqrt{\hat{\sigma}^{jj} \hat{\sigma}^{kk}}}{\hat{\sigma}^{ii}} \right) \right] \\
&\quad - w_k \left[ \frac{\overline{y_i y_k}}{y_i y_k} \left( \sqrt{\frac{\sigma^{ii}}{\sigma^{kk}}} - \sqrt{\frac{\hat{\sigma}^{ii}}{\hat{\sigma}^{kk}}} \right) - \sum_{j \neq k} \overline{y_j y_i} \rho^{kj} \left( \frac{\sqrt{\sigma^{jj} \sigma^{ii}}}{\sigma^{kk}} - \frac{\sqrt{\hat{\sigma}^{jj} \hat{\sigma}^{ii}}}{\hat{\sigma}^{kk}} \right) \right],
\end{aligned}$$

where for  $1 \leq i, j \leq p$ ,  $\overline{y_i y_j} := \frac{1}{n} \sum_{l=1}^n y_i^l y_j^l$ . Let  $\sigma_{ij}$  denote the  $(i, j)$ -th element of the true covariance matrix  $\bar{\Sigma}$ . By C1,  $\{\sigma_{ij} : 1 \leq i, j \leq p\}$  are bounded from below and above, thus

$$\max_{1 \leq i, j \leq p} |\overline{y_i y_j} - \sigma_{ij}| = O_p\left(\sqrt{\frac{\log n}{n}}\right).$$

(Throughout the proof,  $O_p(\cdot)$  means that for any  $\eta > 0$ , for sufficiently large  $n$ , the left hand side is bounded by the order within  $O_p(\cdot)$  with probability at least  $1 - O(n^{-\eta})$ .)

Therefore

$$\sum_{j \neq i} |\overline{y_j y_k} - \sigma_{jk}| |\rho^{ij}| \leq \left( \sum_{j \neq i} |\rho^{ij}| \right) \max_{1 \leq i, j \leq p} |\overline{y_i y_j} - \sigma_{ij}| \leq \left( \sqrt{q_n \sum_{j \neq i} (\rho^{ij})^2} \right) \max_{1 \leq i, j \leq p} |\overline{y_i y_j} - \sigma_{ij}| = o(1),$$

where the last inequality is by Cauchy-Schwartz and the fact that, for fixed  $i$ , there are at most  $q_n$  non-zero  $\rho^{ij}$ . The last equality is due to the assumption  $q_n \sim o(\frac{n}{\log n})$ , and the fact that  $\sum_{j \neq i} (\rho^{ij})^2$  is bounded which is in turn implied by condition C1.

Therefore,

$$\begin{aligned}
& |L'_{n,ik}(\bar{\theta}, \bar{\sigma}, \mathbf{Y}) - L'_{n,ik}(\bar{\theta}, \hat{\sigma}, \mathbf{Y})| \\
&\leq (w_i |\sigma_{ik}| + w_k |\sigma_{ik}|) \max_{i,k} \left| \sqrt{\frac{\sigma^{kk}}{\sigma^{ii}}} - \sqrt{\frac{\hat{\sigma}^{kk}}{\hat{\sigma}^{ii}}} \right| + (w_i \tau_{ki} + w_k \tau_{ik}) \max_{i,j,k} \left| \frac{\sqrt{\sigma^{jj} \sigma^{kk}}}{\sigma^{ii}} - \frac{\sqrt{\hat{\sigma}^{jj} \hat{\sigma}^{kk}}}{\hat{\sigma}^{ii}} \right| + R_n,
\end{aligned}$$

where  $\tau_{ki} := \sum_{j \neq i} |\sigma_{jk} \rho^{ij}|$ , and the reminder term  $R_n$  is of smaller order of the leading terms. Since C1 implies B0, thus together with condition D, we have

$$\max_{1 \leq i, k \leq p} \left| \sqrt{\frac{\sigma^{ii}}{\sigma^{kk}}} - \sqrt{\frac{\widehat{\sigma}^{ii}}{\widehat{\sigma}^{kk}}} \right| = O_p\left(\sqrt{\frac{\log n}{n}}\right),$$

$$\max_{1 \leq i, j, k \leq p} \left| \frac{\sqrt{\sigma^{jj} \sigma^{ii}}}{\sigma^{kk}} - \frac{\sqrt{\widehat{\sigma}^{jj} \widehat{\sigma}^{ii}}}{\widehat{\sigma}^{kk}} \right| = O_p\left(\sqrt{\frac{\log n}{n}}\right).$$

Moreover, by Cauchy-Schwartz

$$\tau_{ki} \leq \sqrt{\sum_j (\rho^{ij})^2} \sqrt{\sum_j (\sigma_{jk})^2},$$

and the right hand side is uniformly bounded (over  $(i, k)$ ) due to condition C1. Thus by C0, C1 and D, we have showed

$$\max_{i, k} |L'_{n, ik}(\bar{\theta}, \bar{\sigma}, \mathbf{Y}) - L'_{n, ik}(\hat{\theta}, \hat{\sigma}, \mathbf{Y})| = O_p\left(\sqrt{\frac{\log n}{n}}\right).$$

Observe that, for  $1 \leq i < k \leq p, 1 \leq t < s \leq p$

$$L''_{n, ik, ts} = \begin{cases} \frac{1}{n} \sum_{l=1}^n w_i \frac{\sigma^{kk}}{\sigma^{ii}} y_k^l + w_k \frac{\sigma^{ii}}{\sigma^{kk}} y_i^l, & \text{if } (i, k) = (t, s) \\ \frac{1}{n} \sum_{l=1}^n w_i \frac{\sqrt{\sigma^{kk} \sigma^{ss}}}{\sigma^{ii}} y_s^l y_k^l, & \text{if } i = t, k \neq s \\ \frac{1}{n} \sum_{l=1}^n w_k \frac{\sqrt{\sigma^{tt} \sigma^{ii}}}{\sigma^{kk}} y_t^l y_i^l, & \text{if } i \neq t, k = s \\ 0 & \text{if } \textit{otherwise}. \end{cases}$$

Thus by similar arguments as in the above, it is easy to proof the claim.

## Part II

In this section, we proof the main results (Theorems 1–3). We first give a few lemmas.



**Lemma S-1** (*Karush-Kuhn-Tucker condition*)  $\hat{\theta}$  is a solution of the optimization problem

$$\arg \min_{\theta: \theta_{\mathcal{S}^c} = 0} L_n(\theta, \hat{\sigma}, \mathbf{Y}) + \lambda_n \|\theta\|_1,$$

where  $\mathcal{S}$  is a subset of  $\mathcal{T} := \{(i, j) : 1 \leq i < j \leq p\}$ , if and only if

$$\begin{aligned} L'_{n,ij}(\hat{\theta}, \hat{\sigma}, \mathbf{Y}) &= \lambda_n \text{sign}(\hat{\theta}_{ij}), \quad \text{if } \hat{\theta}_{ij} \neq 0 \\ |L'_{n,ij}(\hat{\theta}, \hat{\sigma}, \mathbf{Y})| &\leq \lambda_n, \quad \text{if } \hat{\theta}_{ij} = 0, \end{aligned}$$

for  $(i, j) \in \mathcal{S}$ . Moreover, if the solution is not unique,  $|L'_{n,ij}(\tilde{\theta}, \hat{\sigma}, \mathbf{Y})| < \lambda_n$  for some specific solution  $\tilde{\theta}$  and  $L'_{n,ij}(\theta, \hat{\sigma}, \mathbf{Y})$  being continuous in  $\theta$  imply that  $\hat{\theta}_{ij} = 0$  for all solutions  $\hat{\theta}$ . (Note that optimization problem (9) corresponds to  $\mathcal{S} = \mathcal{T}$  and the restricted optimization problem (11) corresponds to  $\mathcal{S} = \mathcal{A}$ .)

**Lemma S-2** For the loss function defined by (S-2), if conditions C0-C1 hold and condition D holds for  $\hat{\sigma}$  and if  $q_n \sim o(\frac{n}{\log n})$ , then for any  $\eta > 0$ , there exist constants  $c_{0,\eta}, c_{1,\eta}, c_{2,\eta}, c_{3,\eta} > 0$ , such that for any  $u \in \mathbb{R}^{q_n}$  the following hold with probability at least  $1 - O(n^{-\eta})$  for sufficiently large  $n$ :

$$\begin{aligned} \|L'_{n,\mathcal{A}}(\bar{\theta}, \hat{\sigma}, \mathbf{Y})\|_2 &\leq c_{0,\eta} \sqrt{\frac{q_n \log n}{n}} \\ |u^T L'_{n,\mathcal{A}}(\bar{\theta}, \hat{\sigma}, \mathbf{Y})| &\leq c_{1,\eta} \|u\|_2 \left( \sqrt{\frac{q_n \log n}{n}} \right) \\ |u^T L''_{n,\mathcal{A}\mathcal{A}}(\bar{\theta}, \hat{\sigma}, \mathbf{Y})u - u^T \bar{L}''_{\mathcal{A}\mathcal{A}}(\bar{\theta})u| &\leq c_{2,\eta} \|u\|_2^2 \left( q_n \sqrt{\frac{\log n}{n}} \right) \\ \|L''_{n,\mathcal{A}\mathcal{A}}(\bar{\theta}, \hat{\sigma}, \mathbf{Y})u - \bar{L}''_{\mathcal{A}\mathcal{A}}(\bar{\theta})u\|_2 &\leq c_{3,\eta} \|u\|_2 \left( q_n \sqrt{\frac{\log n}{n}} \right) \end{aligned}$$

proof of Lemma S-2: If we replace  $\hat{\sigma}$  by  $\bar{\sigma}$  on the left hand side, then the above results follow easily from Cauchy-Schwartz and Bernstein's inequalities by using B1.2.

Further observe that,

$$\|L'_{n,\mathcal{A}}(\bar{\theta}, \hat{\sigma}, \mathbf{Y})\|_2 \leq \|L'_{n,\mathcal{A}}(\bar{\theta}, \bar{\sigma}, \mathbf{Y})\|_2 + \|L'_{n,\mathcal{A}}(\bar{\theta}, \bar{\sigma}, \mathbf{Y}) - L'_{n,\mathcal{A}}(\bar{\theta}, \hat{\sigma}, \mathbf{Y})\|_2,$$

and the second term on the right hand side has order  $\sqrt{\frac{q_n \log n}{n}}$ , since there are  $q_n$  terms and by B3, they are uniformly bounded by  $\sqrt{\frac{\log n}{n}}$ . The rest of the lemma can be proved by similar arguments.

The following two lemmas are used for proving Theorem 1.

**Lemma S-3** *Assuming the same conditions of Theorem 1. Then there exists a constant  $C_1(\bar{\theta}) > 0$ , such that for any  $\eta > 0$ , the probability that there exists a local minima of the restricted problem (11) within the disc:*

$$\{\theta : \|\theta - \bar{\theta}\|_2 \leq C_1(\bar{\theta})\sqrt{q_n}\lambda_n\}.$$

is at least  $1 - O(n^{-\eta})$  for sufficiently large  $n$ .

proof of Lemma S-3: Let  $\alpha_n = \sqrt{q_n}\lambda_n$ , and  $Q_n(\theta, \hat{\sigma}, \mathbf{Y}, \lambda_n) = L_n(\theta, \hat{\sigma}, \mathbf{Y}) + \lambda_n\|\theta\|_1$ .

Then for any given constant  $C > 0$  and any vector  $u \in R^p$  such that  $u_{\mathcal{A}^c} = 0$  and  $\|u\|_2 = C$ , by the triangle inequality and Cauchy-Schwartz inequality, we have

$$\|\bar{\theta}\|_1 - \|\bar{\theta} + \alpha_n u\|_1 \leq \alpha_n \|u\|_1 \leq C\alpha_n \sqrt{q_n}.$$

Thus

$$\begin{aligned} & Q_n(\bar{\theta} + \alpha_n u, \hat{\sigma}, \mathbf{Y}, \lambda_n) - Q_n(\bar{\theta}, \hat{\sigma}, \mathbf{Y}, \lambda_n) \\ &= \{L_n(\bar{\theta} + \alpha_n u, \hat{\sigma}, \mathbf{Y}) - L_n(\bar{\theta}, \hat{\sigma}, \mathbf{Y})\} - \lambda_n\{\|\bar{\theta}\|_1 - \|\bar{\theta} + \alpha_n u\|_1\} \\ &\geq \{L_n(\bar{\theta} + \alpha_n u, \hat{\sigma}, \mathbf{Y}) - L_n(\bar{\theta}, \hat{\sigma}, \mathbf{Y})\} - C\alpha_n \sqrt{q_n}\lambda_n \\ &= \{L_n(\bar{\theta} + \alpha_n u, \hat{\sigma}, \mathbf{Y}) - L_n(\bar{\theta}, \hat{\sigma}, \mathbf{Y})\} - C\alpha_n^2. \end{aligned}$$

Thus for any  $\eta > 0$ , there exists  $c_{1,\eta}, c_{2,\eta} > 0$ , such that, with probability at least  $1 - O(n^{-\eta})$

$$\begin{aligned} L_n(\bar{\theta} + \alpha_n u, \hat{\sigma}, \mathbf{Y}) - L_n(\bar{\theta}, \hat{\sigma}, \mathbf{Y}) &= \alpha_n u_{\mathcal{A}}^T L'_{n,\mathcal{A}}(\bar{\theta}, \hat{\sigma}, \mathbf{Y}) + \frac{1}{2} \alpha_n^2 u_{\mathcal{A}}^T L''_{n,\mathcal{A}\mathcal{A}}(\bar{\theta}, \hat{\sigma}, \mathbf{Y}) u_{\mathcal{A}} \\ &= \frac{1}{2} \alpha_n^2 u_{\mathcal{A}}^T \bar{L}''_{\mathcal{A}\mathcal{A}}(\bar{\theta}) u_{\mathcal{A}} + \alpha_n u_{\mathcal{A}}^T L'_{n,\mathcal{A}}(\bar{\theta}, \hat{\sigma}, \mathbf{Y}) + \frac{1}{2} \alpha_n^2 u_{\mathcal{A}}^T \left( L''_{n,\mathcal{A}\mathcal{A}}(\bar{\theta}, \hat{\sigma}, \mathbf{Y}) - \bar{L}''_{\mathcal{A}\mathcal{A}}(\bar{\theta}) \right) u_{\mathcal{A}} \\ &\geq \frac{1}{2} \alpha_n^2 u_{\mathcal{A}}^T \bar{L}''_{\mathcal{A}\mathcal{A}}(\bar{\theta}) u_{\mathcal{A}} - c_{1,\eta} (\alpha_n q_n^{1/2} n^{-1/2} \sqrt{\log n}) - c_{2,\eta} (\alpha_n^2 q_n n^{-1/2} \sqrt{\log n}). \end{aligned}$$

In the above, the first equation is because the loss function  $L(\theta, \sigma, Y)$  is quadratic in  $\theta$  and  $u_{\mathcal{A}^c} = 0$ . The inequality is due to Lemma S-2 and the union bound. By the **assumption**  $\lambda_n \sqrt{\frac{n}{\log n}} \rightarrow \infty$ , we have  $\alpha_n q_n^{1/2} n^{-1/2} \sqrt{\log n} = o(\alpha_n \sqrt{q_n} \lambda_n) = o(\alpha_n^2)$ . Also by the **assumption that**  $q_n \sim o(\sqrt{n/\log n})$ , we have  $\alpha_n^2 q_n n^{-1/2} \sqrt{\log n} = o(\alpha_n^2)$ . Thus, with  $n$  sufficiently large

$$Q_n(\bar{\theta} + \alpha_n u, \hat{\sigma}, \mathbf{Y}, \lambda_n) - Q_n(\bar{\theta}, \hat{\sigma}, \mathbf{Y}, \lambda_n) \geq \frac{1}{4} \alpha_n^2 u_{\mathcal{A}}^T \bar{L}''_{\mathcal{A}\mathcal{A}}(\bar{\theta}) u_{\mathcal{A}} - C \alpha_n^2$$

with probability at least  $1 - O(n^{-\eta})$ . By B1,  $u_{\mathcal{A}}^T \bar{L}''_{\mathcal{A}\mathcal{A}}(\bar{\theta}) u_{\mathcal{A}} \geq \Lambda_{\min}^L(\bar{\theta}) \|u_{\mathcal{A}}\|_2^2 = \Lambda_{\min}^L(\bar{\theta}) C^2$ . Thus, if we choose  $C = 4/\Lambda_{\min}^L(\bar{\theta}) + \epsilon$ , then for any  $\eta > 0$ , for sufficiently large  $n$ , the following holds

$$\inf_{u: u_{\mathcal{A}^c} = 0, \|u\|_2 = C} Q_n(\bar{\theta} + \alpha_n u, \hat{\sigma}, \mathbf{Y}, \lambda_n) > Q_n(\bar{\theta}, \hat{\sigma}, \mathbf{Y}, \lambda_n),$$

with probability at least  $1 - O(n^{-\eta})$ . This means that a local minima exists within the disc  $\{\theta : \|\theta - \bar{\theta}\|_2 \leq C \alpha_n = C \sqrt{q_n} \lambda_n\}$  with probability at least  $1 - O(n^{-\eta})$ .

**Lemma S-4** *Assuming the same conditions of Theorem 1. Then there exists a constant  $C_2(\bar{\theta}) > 0$ , such that for any  $\eta > 0$ , for sufficiently large  $n$ , the following holds with probability at least  $1 - O(n^{-\eta})$ : for any  $\theta$  belongs to the set  $S = \{\theta : \|\theta - \bar{\theta}\|_2 \geq C_2(\bar{\theta}) \sqrt{q_n} \lambda_n, \theta_{\mathcal{A}^c} = 0\}$ , it has  $\|L'_{n,\mathcal{A}}(\theta, \hat{\sigma}, \mathbf{Y})\|_2 > \sqrt{q_n} \lambda_n$ .*

proof of Lemma S-4: Let  $\alpha_n = \sqrt{q_n}\lambda_n$ . Any  $\theta$  belongs to  $S$  can be written as:  $\theta = \bar{\theta} + \alpha_n u$ , with  $u_{\mathcal{A}^c} = 0$  and  $\|u\|_2 \geq C_2(\bar{\theta})$ . Note that

$$\begin{aligned} L'_{n,\mathcal{A}}(\theta, \hat{\sigma}, \mathbf{Y}) &= L'_{n,\mathcal{A}}(\bar{\theta}, \hat{\sigma}, \mathbf{Y}) + \alpha_n L''_{n,\mathcal{A}\mathcal{A}}(\bar{\theta}, \hat{\sigma}, \mathbf{Y})u \\ &= L'_{n,\mathcal{A}}(\bar{\theta}, \hat{\sigma}, \mathbf{Y}) + \alpha_n (L''_{n,\mathcal{A}\mathcal{A}}(\bar{\theta}, \hat{\sigma}, \mathbf{Y}) - \bar{L}''_{\mathcal{A}\mathcal{A}}(\bar{\theta}))u + \alpha_n \bar{L}''_{\mathcal{A}\mathcal{A}}(\bar{\theta})u. \end{aligned}$$

By the triangle inequality and Lemma S-2, for any  $\eta > 0$ , there exists constants  $c_{0,\eta}, c_{3,\eta} > 0$ , such that

$$\|L'_{n,\mathcal{A}}(\theta, \hat{\sigma}, \mathbf{Y})\|_2 \geq \alpha_n \|\bar{L}''_{\mathcal{A}\mathcal{A}}(\bar{\theta})u\|_2 - c_{0,\eta} (q_n^{1/2} n^{-1/2} \sqrt{\log n}) - c_{3,\eta} \|u\|_2 (\alpha_n q_n n^{-1/2} \sqrt{\log n})$$

with probability at least  $1 - O(n^{-\eta})$ . Thus, similar as in Lemma S-3, for  $n$  sufficiently large,  $\|L'_{n,\mathcal{A}}(\theta, \hat{\sigma}, \mathbf{Y})\|_2 \geq \frac{1}{2}\alpha_n \|\bar{L}''_{\mathcal{A}\mathcal{A}}(\bar{\theta})u\|_2$  with probability at least  $1 - O(n^{-\eta})$ . By B1,  $\|\bar{L}''_{\mathcal{A}\mathcal{A}}(\bar{\theta})u\|_2 \geq \Lambda_{\min}^L(\bar{\theta})\|u\|_2$ . Therefore  $C_2(\bar{\theta})$  can be taken as  $2/\Lambda_{\min}^L(\bar{\theta}) + \epsilon$ .

The following lemma is used in proving Theorem 2.

**Lemma S-5** *Assuming conditions C0-C1. Let  $D_{\mathcal{A}\mathcal{A}}(\bar{\theta}, Y) = L''_{1,\mathcal{A}\mathcal{A}}(\bar{\theta}, Y) - \bar{L}''_{\mathcal{A}\mathcal{A}}(\bar{\theta})$ .*

*Then there exists a constant  $K_2(\bar{\theta}) < \infty$ , such that for any  $(k, l) \in \mathcal{A}$ ,  $\lambda_{\max}(\text{Var}_{\bar{\theta}}(D_{\mathcal{A},kl}(\bar{\theta}, Y))) \leq K_2(\bar{\theta})$ .*

proof of Lemma S-5:  $\text{Var}_{\bar{\theta}}(D_{\mathcal{A},kl}(\bar{\theta}, Y)) = E_{\bar{\theta}}(L''_{1,\mathcal{A},kl}(\bar{\theta}, Y)L''_{1,\mathcal{A},kl}(\bar{\theta}, Y)^T) - \bar{L}''_{\mathcal{A},kl}(\bar{\theta})\bar{L}''_{\mathcal{A},kl}(\bar{\theta})^T$ .

Thus it suffices to show that, there exists a constant  $K_2(\bar{\theta}) > 0$ , such that for all  $(k, l)$

$$\lambda_{\max}(E_{\bar{\theta}}(L''_{1,\mathcal{A},kl}(\bar{\theta}, Y)L''_{1,\mathcal{A},kl}(\bar{\theta}, Y)^T)) \leq K_2(\bar{\theta}).$$

Use the same notations as in the proof of B1. Note that  $L''_{1,\mathcal{A},kl}(\bar{\theta}, Y) = \tilde{x}^T \tilde{w}^2 \tilde{x}_{(k,l)} = \tilde{w}_k \tilde{y}_l x_k + \tilde{w}_l \tilde{y}_k x_l$ . Thus

$$E_{\bar{\theta}}(L''_{1,\mathcal{A},kl}(\bar{\theta}, Y)L''_{1,\mathcal{A},kl}(\bar{\theta}, Y)^T) = \tilde{w}_k^2 \mathbb{E}[\tilde{y}_l^2 x_k x_k^T] + \tilde{w}_l^2 \mathbb{E}[\tilde{y}_k^2 x_l x_l^T] + \tilde{w}_k \tilde{w}_l \mathbb{E}[\tilde{y}_k \tilde{y}_l (x_k x_l^T + x_l x_k^T)],$$

and for  $a \in \mathcal{R}^{p(p-1)/2}$

$$\begin{aligned} & a^T E_{\bar{\theta}}(L''_{1,\mathcal{A},kl}(\bar{\theta}, Y)L''_{1,\mathcal{A},kl}(\bar{\theta}, Y)^T)a \\ &= \tilde{w}_k^2 a_k^T \mathbb{E}[\tilde{y}_l^2 \tilde{y} \tilde{y}^T] a_k + \tilde{w}_l^2 a_l^T \mathbb{E}[\tilde{y}_k^2 \tilde{y} \tilde{y}^T] a_l + 2\tilde{w}_k \tilde{w}_l a_k^T \mathbb{E}[\tilde{y}_k \tilde{y}_l \tilde{y} \tilde{y}^T] a_l. \end{aligned}$$

Since  $\sum_{k=1}^p \|a_k\|_2^2 = 2\|a\|_2^2$ , and by B2:  $\lambda_{\max}(\mathbb{E}[\tilde{y}_i \tilde{y}_j \tilde{y} \tilde{y}^T]) \leq K_1(\bar{\theta})$  for any  $1 \leq i \leq j \leq p$ , the conclusion follows.

*proof of Theorem 1:* The existence of a solution of (11) follows from Lemma S-3. By the Karush-Kuhn-Tucker condition (Lemma S-1), for any solution  $\hat{\theta}$  of (11), it has  $\|L'_{n,\mathcal{A}}(\hat{\theta}, \hat{\sigma}, \mathbf{Y})\|_{\infty} \leq \lambda_n$ . Thus  $\|L'_{n,\mathcal{A}}(\hat{\theta}, \hat{\sigma}, \mathbf{Y})\|_2 \leq \sqrt{q_n} \|L'_{n,\mathcal{A}}(\hat{\theta}, \hat{\sigma}, \mathbf{Y})\|_{\infty} \leq \sqrt{q_n} \lambda_n$ . Thus by Lemma S-4, for any  $\eta > 0$ , for  $n$  sufficiently large with probability at least  $1 - O(n^{-\eta})$ , all solutions of (11) are inside the disc  $\{\theta : \|\theta - \bar{\theta}\|_2 \leq C_2(\bar{\theta}) \sqrt{q_n} \lambda_n\}$ . Since  $\frac{s_n}{\sqrt{q_n} \lambda_n} \rightarrow \infty$ , for sufficiently large  $n$  and  $(i, j) \in \mathcal{A}$ :  $\bar{\theta}_{ij} \geq s_n > 2C_2(\bar{\theta}) \sqrt{q_n} \lambda_n$ . Thus

$$\begin{aligned} 1 - O(n^{-\eta}) &\leq P_{\bar{\theta}} \left( \|\hat{\theta}^{\mathcal{A}, \lambda_n} - \bar{\theta}_{\mathcal{A}}\|_2 \leq C_2(\bar{\theta}) \sqrt{q_n} \lambda_n, \bar{\theta}_{ij} > 2C_2(\bar{\theta}) \sqrt{q_n} \lambda_n, \text{ for all } (i, j) \in \mathcal{A} \right) \\ &\leq P_{\bar{\theta}} \left( \text{sign}(\hat{\theta}_{ij}^{\mathcal{A}, \lambda_n}) = \text{sign}(\bar{\theta}_{ij}), \text{ for all } (i, j) \in \mathcal{A} \right). \end{aligned}$$

*proof of Theorem 2:* For any given  $\eta > 0$ , let  $\eta' = \eta + \kappa$ . Let  $\mathcal{E}_n = \{\text{sign}(\hat{\theta}^{\mathcal{A}, \lambda_n}) = \text{sign}(\bar{\theta})\}$ . Then by Theorem 1,  $P_{\bar{\theta}}(\mathcal{E}_n) \geq 1 - O(n^{-\eta'})$  for sufficiently large  $n$ . On  $\mathcal{E}_n$ , by the Karush-Kuhn-Tucker condition and the expansion of  $L'_{n,\mathcal{A}}(\hat{\theta}^{\mathcal{A}, \lambda_n}, \hat{\sigma}, \mathbf{Y})$  at  $\bar{\theta}$

$$\begin{aligned} -\lambda_n \text{sign}(\bar{\theta}_{\mathcal{A}}) &= L'_{n,\mathcal{A}}(\hat{\theta}^{\mathcal{A}, \lambda_n}, \hat{\sigma}, \mathbf{Y}) = L'_{n,\mathcal{A}}(\bar{\theta}, \hat{\sigma}, \mathbf{Y}) + L''_{n,\mathcal{A}\mathcal{A}}(\bar{\theta}, \hat{\sigma}, \mathbf{Y}) \nu_n \\ &= \bar{L}''_{\mathcal{A}\mathcal{A}}(\bar{\theta}) \nu_n + L'_{n,\mathcal{A}}(\bar{\theta}, \hat{\sigma}, \mathbf{Y}) + \left( L''_{n,\mathcal{A}\mathcal{A}}(\bar{\theta}, \hat{\sigma}, \mathbf{Y}) - \bar{L}''_{\mathcal{A}\mathcal{A}}(\bar{\theta}) \right) \nu_n, \end{aligned}$$

where  $\nu_n := \widehat{\theta}_{\mathcal{A}}^{\mathcal{A}, \lambda_n} - \bar{\theta}_{\mathcal{A}}$ . By the above expression

$$\nu_n = -\lambda_n [\bar{L}_{\mathcal{A}\mathcal{A}}''(\bar{\theta})]^{-1} \text{sign}(\bar{\theta}_{\mathcal{A}}) - [\bar{L}_{\mathcal{A}\mathcal{A}}''(\bar{\theta})]^{-1} [L'_{n,\mathcal{A}}(\bar{\theta}, \widehat{\sigma}, \mathbf{Y}) + D_{n,\mathcal{A}\mathcal{A}}(\bar{\theta}, \widehat{\sigma}, \mathbf{Y}) \nu_n], \quad (\text{S-7})$$

where  $D_{n,\mathcal{A}\mathcal{A}}(\bar{\theta}, \widehat{\sigma}, \mathbf{Y}) = L''_{n,\mathcal{A}\mathcal{A}}(\bar{\theta}, \widehat{\sigma}, \mathbf{Y}) - \bar{L}_{\mathcal{A}\mathcal{A}}''(\bar{\theta})$ . Next, fix  $(i, j) \in \mathcal{A}^c$ , and consider the expansion of  $L'_{n,ij}(\widehat{\theta}^{\mathcal{A}, \lambda_n}, \widehat{\sigma}, \mathbf{Y})$  around  $\bar{\theta}$ :

$$L'_{n,ij}(\widehat{\theta}^{\mathcal{A}, \lambda_n}, \widehat{\sigma}, \mathbf{Y}) = L'_{n,ij}(\bar{\theta}, \widehat{\sigma}, \mathbf{Y}) + L''_{n,ij,\mathcal{A}}(\bar{\theta}, \widehat{\sigma}, \mathbf{Y}) \nu_n. \quad (\text{S-8})$$

Then plug in (S-7) into (S-8), we get

$$\begin{aligned} L'_{n,ij}(\widehat{\theta}^{\mathcal{A}, \lambda_n}, \widehat{\sigma}, \mathbf{Y}) &= -\lambda_n \bar{L}_{ij,\mathcal{A}}''(\bar{\theta}) [\bar{L}_{\mathcal{A}\mathcal{A}}''(\bar{\theta})]^{-1} \text{sign}(\bar{\theta}_{\mathcal{A}}) - \bar{L}_{ij,\mathcal{A}}''(\bar{\theta}) [\bar{L}_{\mathcal{A}\mathcal{A}}''(\bar{\theta})]^{-1} L'_{n,\mathcal{A}}(\bar{\theta}, \widehat{\sigma}, \mathbf{Y}) \\ &+ L'_{n,ij}(\bar{\theta}, \widehat{\sigma}, \mathbf{Y}) + \left[ D_{n,ij,\mathcal{A}}(\bar{\theta}, \widehat{\sigma}, \mathbf{Y}) - \bar{L}_{ij,\mathcal{A}}''(\bar{\theta}) [\bar{L}_{\mathcal{A}\mathcal{A}}''(\bar{\theta})]^{-1} D_{n,\mathcal{A}\mathcal{A}}(\bar{\theta}, \widehat{\sigma}, \mathbf{Y}) \right] \nu_n. \end{aligned} \quad (\text{S-9})$$

By condition C2, for any  $(i, j) \in \mathcal{A}^c$ :  $|\bar{L}_{ij,\mathcal{A}}''(\bar{\theta}) [\bar{L}_{\mathcal{A}\mathcal{A}}''(\bar{\theta})]^{-1} \text{sign}(\bar{\theta}_{\mathcal{A}})| \leq \delta < 1$ . Thus it suffices to prove that the remaining terms in (S-9) are all  $o(\lambda_n)$  with probability at least  $1 - O(n^{-\eta'})$  (uniformly for all  $(i, j) \in \mathcal{A}^c$ ). Then since  $|\mathcal{A}^c| \leq p \sim O(n^\kappa)$ , by the union bound, the event  $\max_{(i,j) \in \mathcal{A}^c} |L'_{n,ij}(\widehat{\theta}^{\mathcal{A}, \lambda_n}, \widehat{\sigma}, \mathbf{Y})| < \lambda_n$  holds with probability at least  $1 - O(n^{\kappa-\eta'}) = 1 - O(n^{-\eta})$ , when  $n$  is sufficiently large.

By B1.4, for any  $(i, j) \in \mathcal{A}^c$ :  $\|\bar{L}_{ij,\mathcal{A}}''(\bar{\theta}) [\bar{L}_{\mathcal{A}\mathcal{A}}''(\bar{\theta})]^{-1}\|_2 \leq M(\bar{\theta})$ . Therefore by Lemma S-2, for any  $\eta > 0$ , there exists a constant  $C_{1,\eta} > 0$ , such that

$$\max_{(i,j) \in \mathcal{A}^c} |\bar{L}_{ij,\mathcal{A}}''(\bar{\theta}) [\bar{L}_{\mathcal{A}\mathcal{A}}''(\bar{\theta})]^{-1} L'_{n,\mathcal{A}}(\bar{\theta}, \widehat{\sigma}, \mathbf{Y})| \leq C_{1,\eta} \left( \sqrt{\frac{q_n \log n}{n}} \right) = o(\lambda_n)$$

with probability at least  $1 - O(n^{-\eta})$ . The claim follows by the **assumption**  $\sqrt{\frac{q_n \log n}{n}} \sim o(\lambda_n)$ .

By B1.2,  $\|\text{Var}_{\bar{\theta}}(L'_{ij}(\bar{\theta}, \bar{\sigma}, \mathbf{Y}))\|_2 \leq M_1(\bar{\theta})$ . Then similarly as in Lemma S-2, for

any  $\eta > 0$ , there exists a constant  $C_{2,\eta} > 0$ , such that  $\max_{i,j} |L'_{n,ij}(\bar{\theta}, \hat{\sigma}, \mathbf{Y})| \leq C_{2,\eta}(\sqrt{\frac{\log n}{n}}) = o(\lambda_n)$ , with probability at least  $1 - O(n^{-\eta})$ . The claims follows by the **assumption that**  $\lambda_n \sqrt{\frac{n}{\log n}} \rightarrow \infty$ .

Note that by Theorem 1, for any  $\eta > 0$ ,  $\|\nu_n\|_2 \leq C(\bar{\theta})\sqrt{q_n}\lambda_n$  with probability at least  $1 - O(n^{-\eta})$  for large enough  $n$ . Thus, similarly as in Lemma S-2, for any  $\eta > 0$ , there exists a constant  $C_{3,\eta}$ , such  $|D_{n,ij,\mathcal{A}}(\bar{\theta}, \hat{\sigma}, \mathbf{Y})\nu_n| \leq C_{3,\eta}(\sqrt{\frac{q_n \log n}{n}}\sqrt{q_n}\lambda_n)(= o(\lambda_n))$ , with probability at least  $1 - O(n^{-\eta})$ . The claims follows from **the assumption**  $q_n \sim o(\sqrt{\frac{n}{\log n}})$ .

Finally, let  $b^T = [\bar{L}''_{ij,\mathcal{A}}(\bar{\theta})[\bar{L}''_{\mathcal{A}\mathcal{A}}(\bar{\theta})]^{-1}$ . By Cauchy-Schwartz inequality

$$|b^T D_{n,\mathcal{A}\mathcal{A}}(\bar{\theta}, \bar{\sigma}, \mathbf{Y})\nu_n| \leq \|b^T D_{n,\mathcal{A}\mathcal{A}}(\bar{\theta}, \bar{\sigma}, \mathbf{Y})\|_2 \|\nu_n\|_2 \leq q_n \lambda_n \max_{(k,l) \in \mathcal{A}} |b^T D_{n,\mathcal{A},kl}(\bar{\theta}, \bar{\sigma}, \mathbf{Y})|.$$

In order to show the right hand side is  $o(\lambda_n)$  with probability at least  $1 - O(n^{-\eta})$ , it suffices to show  $\max_{(k,l) \in \mathcal{A}} |b^T D_{n,\mathcal{A},kl}(\bar{\theta}, \bar{\sigma}, \mathbf{Y})| = O(\sqrt{\frac{\log n}{n}})$  with probability at least  $1 - O(n^{-\eta})$ , because of the **the assumption**  $q_n \sim o(\sqrt{\frac{n}{\log n}})$ . This is implied by

$$E_{\bar{\theta}}(|b^T D_{\mathcal{A},kl}(\bar{\theta}, \bar{\sigma}, Y)|^2) \leq \|b\|_2^2 \lambda_{\max}(\text{Var}_{\bar{\theta}}(D_{\mathcal{A},kl}(\bar{\theta}, \bar{\sigma}, Y)))$$

being bounded, which follows immediately from B1.4 and Lemma S-5. Finally, similarly as in Lemma S-2,

$$|b^T D_{n,\mathcal{A}\mathcal{A}}(\bar{\theta}, \hat{\sigma}, \mathbf{Y})\nu_n| \leq |b^T D_{n,\mathcal{A}\mathcal{A}}(\bar{\theta}, \bar{\sigma}, \mathbf{Y})\nu_n| + |b^T (D_{n,\mathcal{A}\mathcal{A}}(\bar{\theta}, \bar{\sigma}, \mathbf{Y}) - D_{n,\mathcal{A}\mathcal{A}}(\bar{\theta}, \hat{\sigma}, \mathbf{Y}))\nu_n|,$$

where by B3, the second term on the right hand side is bounded by  $O_p(\sqrt{\frac{\log n}{n}})\|b\|_2\|\nu_n\|_2$ . Note that  $\|b\|_2 \sim \sqrt{q_n}$ , thus the second term is also of order  $o(\lambda_n)$  by **the assumption**  $q_n \sim o(\sqrt{\frac{n}{\log n}})$ . This completes the proof.

proof of Theorem 3: By Theorems 1 and 2 and the Karush-Kuhn-Tucker condition,

for any  $\eta > 0$ , with probability at least  $1 - O(n^{-\eta})$ , a solution of the restricted problem is also a solution of the original problem. On the other hand, by Theorem 2 and the Karush-Kuhn-Tucker condition, with high probability, any solution of the original problem is a solution of the restricted problem. Therefore, by Theorem 1, the conclusion follows.

## Part III

In this section, we provide details for the implementation of `space` which takes advantage of the sparse structure of  $\mathcal{X}$ . Denote the target loss function as

$$f(\theta) = \frac{1}{2} \|\mathcal{Y} - \mathcal{X}\theta\|^2 + \lambda_1 \sum_{i < j} |\rho^{ij}|. \quad (\text{S-10})$$

Our goal is to find  $\hat{\theta} = \operatorname{argmin}_{\theta} f(\theta)$  for a given  $\lambda_1$ . We will employ `active-shooting` algorithm (Section 2.3) to solve this optimization problem.

Without loss of generality, we assume  $\operatorname{mean}(\mathbf{Y}_i) = 1/n \sum_{k=1}^n y_i^k = 0$  for  $i = 1, \dots, p$ . Denote  $\xi_i = \mathbf{Y}_i^T \mathbf{Y}_i$ . We have

$$\begin{aligned} \mathcal{X}_{(i,j)}^T \mathcal{X}_{(i,j)} &= \xi_j \frac{\sigma^{jj}}{\sigma^{ii}} + \xi_i \frac{\sigma^{ii}}{\sigma^{jj}}; \\ \mathcal{Y}^T \mathcal{X}_{(i,j)} &= \sqrt{\frac{\sigma^{jj}}{\sigma^{ii}}} \mathbf{Y}_i^T \mathbf{Y}_j + \sqrt{\frac{\sigma^{ii}}{\sigma^{jj}}} \mathbf{Y}_j^T \mathbf{Y}_i. \end{aligned}$$

Denote  $\rho^{ij} = \rho_{(i,j)}$ . We now present details of the initialization step and the updating steps in the `active-shooting` algorithm.

### 1. Initialization



Let

$$\begin{aligned}\rho_{(i,j)}^{(0)} &= \frac{(|\mathcal{Y}^T \mathcal{X}_{(i,j)}| - \lambda_1)_+ \cdot \text{sign}(\mathcal{Y}^T \mathcal{X}_{(i,j)})}{\mathcal{X}_{(i,j)}^T \mathcal{X}_{(i,j)}} \\ &= \frac{\left( \left| \sqrt{\frac{\sigma^{jj}}{\sigma^{ii}}} \mathbf{Y}_i^T \mathbf{Y}_j + \sqrt{\frac{\sigma^{ii}}{\sigma^{jj}}} \mathbf{Y}_j^T \mathbf{Y}_i \right| - \lambda_1 \right)_+ \cdot \text{sign}(\mathbf{Y}_i^T \mathbf{Y}_j)}{\xi_j \frac{\sigma^{jj}}{\sigma^{ii}} + \xi_i \frac{\sigma^{ii}}{\sigma^{jj}}}.\end{aligned}\quad (\text{S-11})$$

For  $j = 1, \dots, p$ , compute

$$\widehat{\mathbf{Y}}_j^{(0)} = \left( \sqrt{\frac{\sigma^{11}}{\sigma^{jj}}} \mathbf{Y}_1, \dots, \sqrt{\frac{\sigma^{pp}}{\sigma^{jj}}} \mathbf{Y}_p \right) \cdot \begin{pmatrix} \rho_{(1,j)}^{(0)} \\ \vdots \\ \rho_{(p,j)}^{(0)} \end{pmatrix}, \quad (\text{S-12})$$

and

$$E^{(0)} = \mathcal{Y} - \widehat{\mathcal{Y}}^{(0)} = \left( (E_1^{(0)})^T, \dots, (E_p^{(0)})^T \right), \quad (\text{S-13})$$

where  $E_j^{(0)} = \mathbf{Y}_j - \widehat{\mathbf{Y}}_j^{(0)}$ , for  $1 \leq j \leq p$ .

## 2. Update $\rho_{(i,j)}^{(0)} \longrightarrow \rho_{(i,j)}^{(1)}$

Let

$$A_{(i,j)} = (E_j^{(0)})^T \cdot \sqrt{\frac{\sigma^{ii}}{\sigma^{jj}}} \mathbf{Y}_i, \quad (\text{S-14})$$

$$A_{(j,i)} = (E_i^{(0)})^T \cdot \sqrt{\frac{\sigma^{jj}}{\sigma^{ii}}} \mathbf{Y}_j. \quad (\text{S-15})$$

We have

$$\begin{aligned}(E^{(0)})^T \mathcal{X}_{(i,j)} &= (E_i^{(0)})^T \cdot \sqrt{\frac{\sigma^{jj}}{\sigma^{ii}}} \mathbf{Y}_j + (E_j^{(0)})^T \cdot \sqrt{\frac{\sigma^{ii}}{\sigma^{jj}}} \mathbf{Y}_i \\ &= A_{(j,i)} + A_{(i,j)}.\end{aligned}\quad (\text{S-16})$$

It follows

$$\begin{aligned}\rho_{(i,j)}^{(1)} &= \text{sign} \left( \frac{(E^{(0)})^T \mathcal{X}_{(i,j)}}{\mathcal{X}_{(i,j)}^T \mathcal{X}_{(i,j)}} + \rho_{(i,j)}^{(0)} \right) \left( \left| \frac{(E^{(0)})^T \mathcal{X}_{(i,j)}}{\mathcal{X}_{(i,j)}^T \mathcal{X}_{(i,j)}} + \rho_{(i,j)}^{(0)} \right| - \frac{\lambda_1}{\mathcal{X}_{(i,j)}^T \mathcal{X}_{(i,j)}} \right)_+ \\ &= \text{sign} \left( \frac{A_{(j,i)} + A_{(i,j)}}{\xi_j \frac{\sigma^{jj}}{\sigma^{ii}} + \xi_i \frac{\sigma^{ii}}{\sigma^{jj}}} + \rho_{(i,j)}^{(0)} \right) \left( \left| \frac{A_{(j,i)} + A_{(i,j)}}{\xi_j \frac{\sigma^{jj}}{\sigma^{ii}} + \xi_i \frac{\sigma^{ii}}{\sigma^{jj}}} + \rho_{(i,j)}^{(0)} \right| - \frac{\lambda_1}{\xi_j \frac{\sigma^{jj}}{\sigma^{ii}} + \xi_i \frac{\sigma^{ii}}{\sigma^{jj}}} \right)_+.\end{aligned}\quad (\text{S-17})$$

### 3. Update $\rho^{(t)} \longrightarrow \rho^{(t+1)}$

From the previous iteration, we have

- $E^{(t-1)}$ : residual in the previous iteration ( $np \times 1$  vector).
- $(i_0, j_0)$ : index of coefficient that is updated in the previous iteration.
- $\rho_{(i,j)}^{(t)} = \begin{cases} \rho_{(i,j)}^{(t-1)} & \text{if } (i,j) \neq (i_0, j_0), \text{ nor } (j_0, i_0) \\ \rho_{(i,j)}^{(t-1)} - \Delta & \text{if } (i,j) = (i_0, j_0), \text{ or } (j_0, i_0) \end{cases}$

Then,

$$\begin{aligned}
E_k^{(t)} &= E_k^{(t-1)} \text{ for } k \neq i_0, j_0; \\
E_{j_0}^{(t)} &= E_{j_0}^{(t-1)} + \widehat{\mathbf{Y}}_{j_0}^{(t-1)} - \widehat{\mathbf{Y}}_{j_0}^{(t)} \\
&= E_{j_0}^{(t-1)} + \sum_{i=1}^p \sqrt{\frac{\sigma^{ii}}{\sigma^{j_0 j_0}}} \mathbf{Y}_i (\rho_{(i,j_0)}^{(t-1)} - \rho_{(i,j_0)}^{(t)}) \\
&= E_{j_0}^{(t-1)} + \sqrt{\frac{\sigma^{i_0 i_0}}{\sigma^{j_0 j_0}}} \mathbf{Y}_{i_0} \cdot \Delta; \\
E_{i_0}^{(t)} &= E_{i_0}^{(t-1)} + \sqrt{\frac{\sigma^{j_0 j_0}}{\sigma^{i_0 i_0}}} \mathbf{Y}_{j_0} \cdot \Delta.
\end{aligned} \tag{S-18}$$

Suppose the index of the coefficient we would like to update in this iteration is  $(i_1, j_1)$ ,

then let

$$\begin{aligned}
A_{(i_1, j_1)} &= (E_{j_1}^{(t)})^T \cdot \sqrt{\frac{\sigma^{i_1 i_1}}{\sigma^{j_1 j_1}}} \mathbf{Y}_{i_1}, \\
A_{(j_1, i_1)} &= (E_{i_1}^{(t)})^T \cdot \sqrt{\frac{\sigma^{j_1 j_1}}{\sigma^{i_1 i_1}}} \mathbf{Y}_{j_1}.
\end{aligned}$$

We have

$$\begin{aligned}
\rho_{(i,j)}^{(t+1)} &= \text{sign} \left( \frac{A_{(j_1, i_1)} + A_{(i_1, j_1)}}{\xi_j \frac{\sigma^{j_1 j_1}}{\sigma^{i_1 i_1}} + \xi_{i_1} \frac{\sigma^{i_1 i_1}}{\sigma^{j_1 j_1}}} + \rho_{(i_1, j_1)}^{(t)} \right) \\
&\times \left( \left| \frac{A_{(j_1, i_1)} + A_{(i_1, j_1)}}{\xi_j \frac{\sigma^{j_1 j_1}}{\sigma^{i_1 i_1}} + \xi_{i_1} \frac{\sigma^{i_1 i_1}}{\sigma^{j_1 j_1}}} + \rho_{(i_1, j_1)}^{(t)} \right| - \frac{\lambda_1}{\xi_j \frac{\sigma^{j_1 j_1}}{\sigma^{i_1 i_1}} + \xi_{i_1} \frac{\sigma^{i_1 i_1}}{\sigma^{j_1 j_1}}} \right)_+.
\end{aligned} \tag{S-19}$$

Using the above steps 1–3, we have implemented the **active-shooting** algorithm in `c`, and the corresponding `R` package **space** to fit the **space** model is available on **cran**.
